# Supplementary material
Source: HighWire-hosted journal article supplement (https://openres.ersjournals.com/content/7/3/00004-2021)
Supplement: inline-supplementary-material-1 [file inline-supplementary-material-1.pdf]

**Supplementary Table 1: Proportion of patients with therapeutic success at visit 2, stratified by exacerbations in the last 12 months**

| Exacerbations in the last 12 months | Proportion of patients with therapeutic success | N    | %      | 95% CI      |
|-------------------------------------|-------------------------------------------------|------|--------|-------------|
| 0                                   | Therapy successful                              | 250  | 56.82  | 52.04–61.5  |
|                                     | Therapy not successful                          | 190  | 43.18  |             |
|                                     | Total                                           | 440  | 100.00 |             |
| 1                                   | Therapy successful                              | 236  | 67.43  | 62.24–72.32 |
|                                     | Therapy not successful                          | 114  | 32.57  |             |
|                                     | Total                                           | 350  | 100.00 |             |
| ≥2                                  | Therapy successful                              | 270  | 77.14  | 72.38–81.44 |
|                                     | Therapy not successful                          | 80   | 22.86  |             |
|                                     | Total                                           | 350  | 100.00 |             |
| Total                               | Therapy successful                              | 756  | 66.32  | 63.49–69.06 |
|                                     | Therapy not successful                          | 384  | 33.68  |             |
|                                     | Total                                           | 1140 | 100.00 |             |

CI, confidence interval.

**Supplementary Table 2: Proportion of patients with therapeutic success at visit 2, stratified by GOLD spirometric classification**

| <b>GOLD spirometric classification</b> | <b>Proportion of patients with therapeutic success</b> | <b>N</b> | <b>%</b> | <b>95% CI</b> |
|----------------------------------------|--------------------------------------------------------|----------|----------|---------------|
| 1                                      | Therapy successful                                     | 12       | 54.55    | 32.21–75.61   |
|                                        | Therapy not successful                                 | 10       | 45.45    |               |
|                                        | Total                                                  | 22       | 100.00   |               |
| 2                                      | Therapy successful                                     | 338      | 67.20    | 62.90–71.29   |
|                                        | Therapy not successful                                 | 165      | 32.80    |               |
|                                        | Total                                                  | 503      | 100.00   |               |
| 3                                      | Therapy successful                                     | 278      | 65.26    | 60.53–69.78   |
|                                        | Therapy not successful                                 | 148      | 34.74    |               |
|                                        | Total                                                  | 426      | 100.00   |               |
| 4                                      | Therapy successful                                     | 69       | 60.00    | 50.45–69.02   |
|                                        | Therapy not successful                                 | 46       | 40.00    |               |
|                                        | Total                                                  | 115      | 100.00   |               |
| Missing                                | Therapy successful                                     | 59       | 79.73    | 68.78–88.19   |
|                                        | Therapy not successful                                 | 15       | 20.27    |               |
|                                        | Total                                                  | 74       | 100.00   |               |
| Total                                  | Therapy successful                                     | 756      | 66.32    | 63.49–69.06   |
|                                        | Therapy not successful                                 | 384      | 33.68    |               |
|                                        | Total                                                  | 1140     | 100.00   |               |

CI, confidence interval; GOLD, Global Initiative for Chronic Obstructive Lung Disease.

**Supplementary Table 3: Proportion of patients with therapeutic success at visit 2, stratified by ICS treatment at baseline**

| Treatment with ICS | Proportion of patients with therapeutic success | N    | %      | 95% CI      |
|--------------------|-------------------------------------------------|------|--------|-------------|
| Baseline ICS       | Therapy successful                              | 58   | 69.05  | 58.02–78.69 |
|                    | Therapy not successful                          | 26   | 30.95  |             |
|                    | Total                                           | 84   | 100.00 |             |
| No baseline ICS    | Therapy successful                              | 698  | 66.10  | 63.15–68.95 |
|                    | Therapy not successful                          | 358  | 33.90  |             |
|                    | Total                                           | 1056 | 100.00 |             |
| Total              | Therapy successful                              | 756  | 66.32  | 63.49–69.06 |
|                    | Therapy not successful                          | 384  | 33.68  |             |
|                    | Total                                           | 1140 | 100.00 |             |

CI, confidence interval; ICS, inhaled corticosteroids.

**Supplementary Table 4: Mean absolute change in CCQ score from visit 1 to visit 2, stratified by prior COPD maintenance treatment and GOLD groups**

| CCQ domain              | Maintenance-naïve<br>(n=959) | Pretreated –<br>LABA only or<br>LAMA only or<br>LABA+ICS<br>(n=181) | GOLD group               |                          |                          |
|-------------------------|------------------------------|---------------------------------------------------------------------|--------------------------|--------------------------|--------------------------|
|                         |                              |                                                                     | B (n=735)                | C (n=128)                | D (n=277)                |
| <b>Symptom</b>          | 0.88±1.08<br>(0.81–0.95)     | 0.60±0.94<br>(0.47–0.74)                                            | 0.72±0.99<br>(0.65–0.80) | 1.06±1.23<br>(0.85–1.28) | 1.03±1.13<br>(0.90–1.16) |
| <b>Functional state</b> | 0.79±1.04<br>(0.73–0.86)     | 0.51±1.11<br>(0.35–0.67)                                            | 0.62±1.00<br>(0.55–0.69) | 0.91±1.24<br>(0.70–1.13) | 1.01±1.05<br>(0.89–1.14) |
| <b>Mental state</b>     | 0.79±1.33<br>(0.71–0.87)     | 0.43±1.34<br>(0.23–0.62)                                            | 0.64±1.27<br>(0.54–0.73) | 0.90±1.37<br>(0.66–1.14) | 0.91±1.49<br>(0.73–1.09) |
| <b>Total CCQ score</b>  | 0.83±0.95<br>(0.77–0.89)     | 0.53±0.89<br>(0.40–0.66)                                            | 0.66±0.86<br>(0.60–0.73) | 0.97±1.14<br>(0.77–1.17) | 1.00±1.03<br>(0.88–1.12) |

Data are presented as mean±SD (95% CI).

CCQ, Clinical COPD Questionnaire; CI, confidence interval; COPD, chronic obstructive pulmonary disease; GOLD, Global Initiative for Chronic Obstructive Lung Disease; ICS, inhaled corticosteroids; LABA, long-acting  $\beta_2$ -agonist; LAMA, long-acting muscarinic antagonist; SD, standard deviation.
